# Supplementary material
Source: PubMed Central journal article supplement (PMC2635804)
Supplement: 0808147106_0808147106SI.pdf [file 0808147106_0808147106SI.pdf]

# Supporting Information

Kearns *et al.* 10.1073/pnas.0808147106

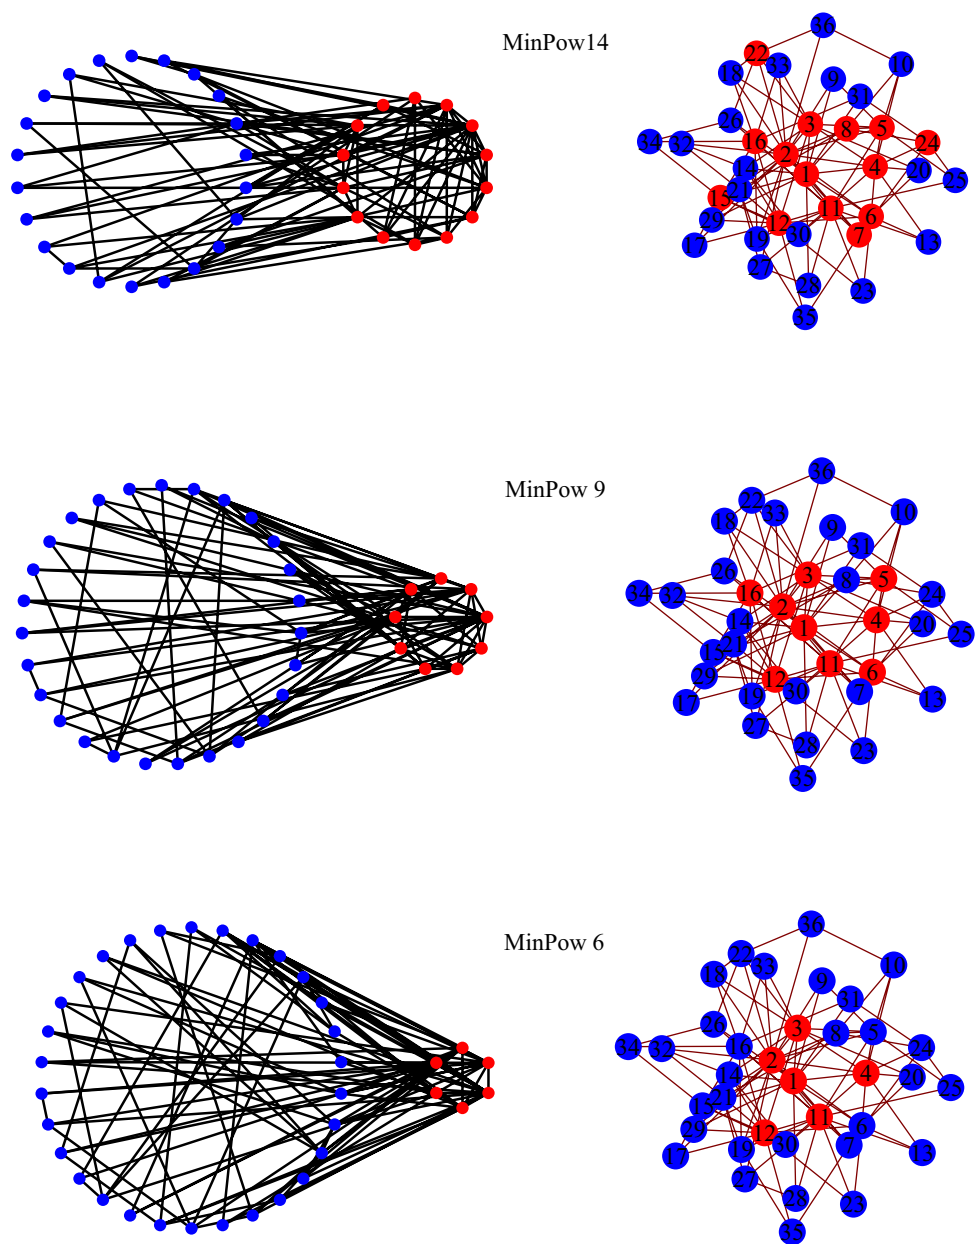

Fig. S1. Network diagrams for the Cohesion experiments with random (Erdos-Renyi) connectivity.

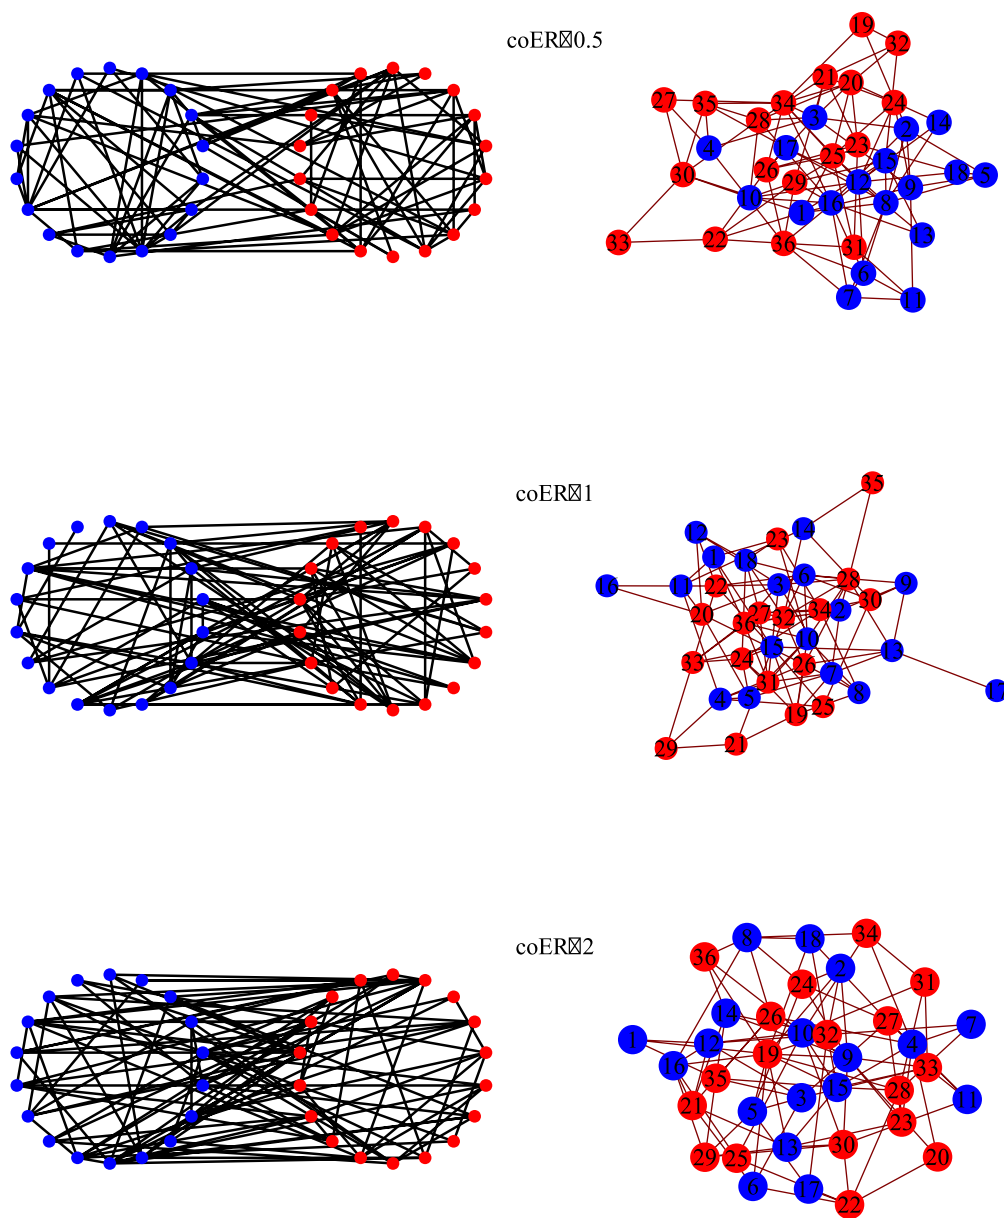

Fig. S2. Network diagrams for the Cohesion experiments with preferential attachment connectivity

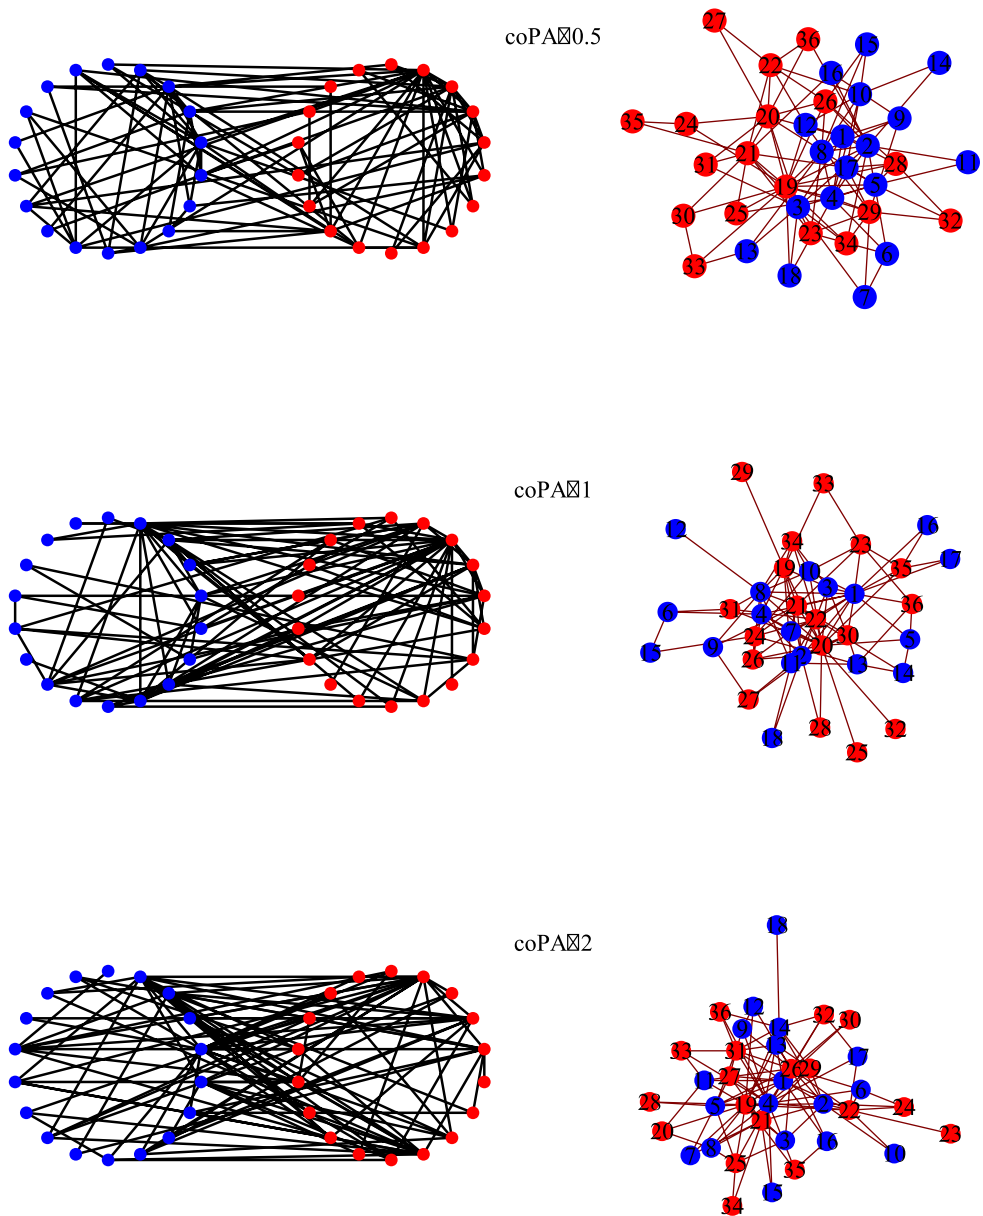

Fig. S3. Network diagrams for the Minority Power experiments.

## Other Supporting Information Files

[SI Appendix](#)
